# Supplementary material for: Descriptive analysis of a 1:1 physiotherapy outpatient intervention post primary lumbar discectomy: one arm of a small-scale parallel randomised controlled trial across two UK sites
Source: PubMed Central journal article supplement — BMJ Open. 2016 Nov 9;6(11):e012151. doi: 10.1136/bmjopen-2016-012151 (PMC5128994; doi:10.1136/bmjopen-2016-012151), 2016-11-09
Supplement: bmjopen-2016-012151supp_S2.pdf [file bmjopen-2016-012151supp_S2.pdf]

Supplementary file S2

Treatment employed by the physiotherapists for the problems present in the n=22 participants

| Problem (in order of treatment record) | No of participants with problem | Treatment employed by the treating physiotherapist | n  | Details added by physiotherapists relating to the treatment (direct quotes)                                                                                                                                                                                                                                                                                                                                                                               |
|----------------------------------------|---------------------------------|----------------------------------------------------|----|-----------------------------------------------------------------------------------------------------------------------------------------------------------------------------------------------------------------------------------------------------------------------------------------------------------------------------------------------------------------------------------------------------------------------------------------------------------|
| Reduced functional mobility            | 12                              | Advice to gradually increase walking distance      | 12 | Goal: be able to do 5 hour walk<br>Already doing, encouraged to continue<br>Walking 30 minutes currently; to increase as he feels able<br>Regular short walks<br>Speed up walking to make aerobic<br>Advice to increase time walking and not worry about distance<br>Progress walks from 3 per week to daily. Monitor stops during 2 mile walk<br>Advised to slow down - build up of exercise gradually<br>If no neurological pain as discussed in detail |
|                                        |                                 | Advice re getting in and out of car                | 1  |                                                                                                                                                                                                                                                                                                                                                                                                                                                           |
|                                        |                                 | Walking activities                                 | 9  | Restoration of normal walking pace to be monitored<br>Discussion with patient - shoe raise as has altered gait due to leg length<br>Walk regularly, especially on days when in meetings<br>Gradually progress walking distance<br>Regular short walks<br>Discussed with patient - increase concentration on left foot position and foot control<br>Treadmill<br>Advised a day's hill walking up Scafell Pike is too much                                  |
|                                        |                                 | Stairs                                             | 2  | 28 stairs to flat. Does minimum 4 flights / day<br>To aim for stairs with right leg leading                                                                                                                                                                                                                                                                                                                                                               |
|                                        |                                 | Advice re how to manage foot drop                  | 2  | Tibialis anterior strengthening - no functional foot drop<br>Monitor left mild foot drop                                                                                                                                                                                                                                                                                                                                                                  |
|                                        |                                 | Others                                             | 4  | Encouraged use of exercise bike                                                                                                                                                                                                                                                                                                                                                                                                                           |

|                                             |    |                                                                      |    |                                                                                                                                                                                                                                                                                                                                                                                                                                                                                                                                                         |
|---------------------------------------------|----|----------------------------------------------------------------------|----|---------------------------------------------------------------------------------------------------------------------------------------------------------------------------------------------------------------------------------------------------------------------------------------------------------------------------------------------------------------------------------------------------------------------------------------------------------------------------------------------------------------------------------------------------------|
|                                             |    |                                                                      |    | Return to gym, advice re bike, treadmill and stepper<br>Calf strengthening<br>Advice re gradual swimming and cycling                                                                                                                                                                                                                                                                                                                                                                                                                                    |
| Reduced knowledge to enable self management | 16 | Explanation of healing, pain, recovery time, expectations of surgery | 15 | Particularly around disc dehydration and nerve root mobility<br>Explained still healing at 6 weeks<br>Nerve damage recovery 4 months. Soft tissue healing 4-8 weeks<br>Can start to increase activity at 6 weeks eg. side plank<br>Need to be careful between 6-12 weeks. Neural recovery 4 months<br>Time scales to return to heavy work and gym work discussed<br>Nerve recovery time scale, bone healing 12 weeks<br>Explain healing time frame and limits to safe return<br>Discussed in session 2 as reason for increased calf ache                |
|                                             |    | Discussion of aims and expectations of treatment                     | 15 | Discussed return to normal activities<br>Explained healing and time lines<br>Resolve leg pain and increase functional activity<br>Restore muscle power to full power<br>Monitor increase in fitness and return to activity<br>Improve lumbar extension. Improve core. Improve condition / stamina for return to work<br>Return to activity and normal work and gym<br>To monitor residual symptoms. Assess and manage core stability<br>Possibility for full/partial recovery discussed with patient                                                    |
|                                             |    | Discuss any anxieties and explore any fear avoidance issues          | 12 | Vigilant re employing correct movement habit<br>Patient not moving into flexion at all due to fear avoidance<br>Work place return and activity practise to decrease anxiety<br>Nil, patient need to be discouraged from overdoing it<br>Mild fear of lumbar flexion<br>Main anxiety is "will I return to golf?"<br>Advice return re gym<br>Post traumatic stress disorder - patient keen to return to high level activity immediately as a coping strategy<br>Discuss fear avoidance<br>Fear of flexion instilled by preoperative emphasis on extension |

|  |  |                                                                                                                                                     |    |                                                                                                                                                                                                                                                                                                                                                                                                                                                                                                                                                                                                        |
|--|--|-----------------------------------------------------------------------------------------------------------------------------------------------------|----|--------------------------------------------------------------------------------------------------------------------------------------------------------------------------------------------------------------------------------------------------------------------------------------------------------------------------------------------------------------------------------------------------------------------------------------------------------------------------------------------------------------------------------------------------------------------------------------------------------|
|  |  | Goal setting                                                                                                                                        | 7  | (1) Walk 5 hours, (2) walk normal pace (3) Do housework thoroughly<br>Independent with home exercise programme, return to gym, improve gait<br>return to low level, high repetitions weight lifting at 8 weeks<br>Return to work by 12 weeks<br>Attempt to set more realistic recovery goals<br>Return to rowing, gentle cycling. At 10-12 weeks golf / mountain biking                                                                                                                                                                                                                                |
|  |  | Reinforcing functional advice from manual e.g. specific advice on driving, milestones etc                                                           | 7  | No heavy lifting 12 weeks to moderate activity. No mountain biking until 12 weeks<br>No heavy lifting etc<br>Advice neutral spine in function<br>Advice on 6 week / 12 week mile stones<br>Advice on rowing position, sitting and forward lean posture                                                                                                                                                                                                                                                                                                                                                 |
|  |  | Discuss increasing activity and to plan to return to work (or normal activities) as soon as able                                                    | 13 | Already returned to work<br>Advice regarding occupational hazards<br>No plan to return to work yet but phased return discussed<br>Assess ability to lift weight after 6 weeks post op<br>Discussed with patient who has already returned to work - requires increased driving and sitting<br>Walking, lifting<br>Plan to build activity and to assess lifting techniques approx 12 weeks<br>Time scales and work handling discussed with patient<br>Phased return to work<br>Decrease activity to enable healing time, no heavy or intense training<br>Returned to sedentary job on day 4 post surgery |
|  |  | Discuss return to work plan and encourage patient to actively consider job/requirements +/- begin discussions with employer regarding graded return | 7  | Practise work physical tasks in physiotherapy session<br>Discuss with employer need for breaks and regular position change<br>Increase walking<br>Patient to consider alternative job roles<br>Discussed pacing                                                                                                                                                                                                                                                                                                                                                                                        |
|  |  | Advice on general activities/ increasing other cardiovascular exercise e.g. gym, swim, cycle etc                                                    | 15 | Discussed gym - cross trainer, bike, gentle increase weights as comfortable<br>Gentle increase in activity and light cardiovascular gym work<br>Can freely increase aerobic work<br>Static bike, increase walking, stairs                                                                                                                                                                                                                                                                                                                                                                              |

|                                  |    |                                                                |    |                                                                                                                                                                                                                                                                                                                                                                                                                                                                                                                                                                                                                                       |
|----------------------------------|----|----------------------------------------------------------------|----|---------------------------------------------------------------------------------------------------------------------------------------------------------------------------------------------------------------------------------------------------------------------------------------------------------------------------------------------------------------------------------------------------------------------------------------------------------------------------------------------------------------------------------------------------------------------------------------------------------------------------------------|
|                                  |    |                                                                |    | <p>Advice on swimming alternate days<br/> Cross trainer, cycle and swim to start<br/> Return to controlled gym work post 12 weeks<br/> Advice to add bike to gym<br/> Advice on gentle cardiovascular exercises</p>                                                                                                                                                                                                                                                                                                                                                                                                                   |
|                                  |    | Advice re smoking and bone healing                             | 0  |                                                                                                                                                                                                                                                                                                                                                                                                                                                                                                                                                                                                                                       |
|                                  |    | Tailored lifting advice                                        | 6  | <p>Lifting posture and technique with a work place hoist<br/> Lifting heavy blocks on return to work</p>                                                                                                                                                                                                                                                                                                                                                                                                                                                                                                                              |
|                                  |    | Tailored postural advice                                       | 10 | <p>Sitting - forward / backward lean using hip, sit to stand<br/> Maintaining stable thorax / pelvis relationship through movements<br/> Maintaining neutral spine / pelvis during sit to stand etc<br/> Sitting, sit to stand<br/> Talked through neutral spine<br/> Flat back posture<br/> Given ergonomic advice sheet, pacing, regular breaks<br/> Sitting posture, forward lean sitting from hip, arm reach, head position</p>                                                                                                                                                                                                   |
|                                  |    | Others                                                         | 2  | <p>Advice re gentle scar massage<br/> Advice re anti-inflammatories as prescribed, and activity modification</p>                                                                                                                                                                                                                                                                                                                                                                                                                                                                                                                      |
| Reduced spinal range of movement | 17 | Accessory movements e.g. posterior-anterior (PA) technique     | 10 | <p>Grade III PA mobilisations central / unilateral x 3 x 30 seconds<br/> PA grade III x 30 seconds<br/> PA grade III L3-5<br/> Grade IV PA mobilisations central and unilateral right L3-5<br/> PA L1-3 grade III, PA in extension L1-3 grade III<br/> Mobilised right L4,5,S1 to decrease pain on hip extension<br/> PA L2 to improve extension but minimal benefit. Better at 2nd session.<br/> Grade III x 3 x 30 sec<br/> Central PA L4/5 grade III, PA grade III left side L4/5 x 1 min, L4 right and left, L3 right and left, combined left side flexion PA L4-5<br/> PA left side grade III L1,2,3,4 facet x 1 minute each</p> |
|                                  |    | Physiological movements / mobility exercises in weight bearing | 8  | <p>Stretches in standing<br/> Lumbar spine stretches in standing<br/> Seated and standing range of movement<br/> Gentle weight bearing range of movement</p>                                                                                                                                                                                                                                                                                                                                                                                                                                                                          |

|                             |    |                                               |    |                                                                                                                                                                                                                                                                                                                           |
|-----------------------------|----|-----------------------------------------------|----|---------------------------------------------------------------------------------------------------------------------------------------------------------------------------------------------------------------------------------------------------------------------------------------------------------------------------|
|                             |    | Physiological movements in non weight bearing | 8  | Lumbar spine active range of movement stretches in crook lying<br>Reviewed current exercises<br>Seated range of movement<br>Lumbar extension<br>To assess lumbar spine vertebral movement<br>Active range of movement exercises                                                                                           |
|                             |    | Others                                        | 2  | Soft tissue techniques and trigger point pressure to left quadratus lumborum<br>Palpation and sacral mobilisation to assess neural interface and re-test SLR                                                                                                                                                              |
| Reduced trunk stabilisation | 20 | Transversus abdominis in neutral              | 17 | Pelvic Tilt<br>Pelvic Tilt<br>Concept gained via explanation of mechanism and pelvic tilt<br>Corrected technique<br>Trans Abdominus setting in crook lying - very poor<br>Supine crook transverses abdominus, pilates 100s exercise<br>Pelvic Tilt<br>Pilates 100 setting<br>Crook lying<br>Transversus abdominus neutral |
|                             |    | Gluteal exercises                             | 12 | Concept gained via explanation of mechanism and pelvic tilt<br>Reviewed current bridging technique<br>Hip extension in prone knee bend<br>Clam and bridge<br>Prone kneeling right hip extension<br>Bridging<br>Piriformis release and patient taught self massage<br>Piriformis stretch and endurance                     |
|                             |    | Progression of transversus abdominis          | 11 | To do whilst walking at gym. Pilates exercises second treatment.<br>100s level 1<br>Decreased control on right leg crook needs addressing prior to lifting 100s and transverses abdominus in sitting<br>Bridge - ball. Single leg bridge<br>With leg slides                                                               |

|                               |    |                                       |   |                                                                                                                                                                                                                                                                                                                                                                                                                                                                          |
|-------------------------------|----|---------------------------------------|---|--------------------------------------------------------------------------------------------------------------------------------------------------------------------------------------------------------------------------------------------------------------------------------------------------------------------------------------------------------------------------------------------------------------------------------------------------------------------------|
|                               |    |                                       |   | Flexion biased<br>Position well maintained, therefore core approach not planned                                                                                                                                                                                                                                                                                                                                                                                          |
|                               |    | Non-specific core stability exercises | 9 | Sitting forward / backward, stand from wall<br>Bridging<br>In standing, forward and backward lean sitting<br>Bridging and review of patients own exercises<br>Core contraction in standing and gym ball as finds crook lying difficult<br>Bridging and global core exercises<br>Excellent balance on perturbation                                                                                                                                                        |
|                               |    | Multifidus retraining                 | 1 | Squat work                                                                                                                                                                                                                                                                                                                                                                                                                                                               |
|                               |    | Advanced trunk stabilisation          | 4 | Bridge to 1/2 range: overuses spinal extensors beyond this<br>Advice on gym ball and gym work<br>Right side plank with left hip abduction<br>Bridging and increased gluteal control. Higher end core work                                                                                                                                                                                                                                                                |
|                               |    | Others                                | 4 | Trunk stabilisation in sitting, standing, sitting to standing and lifting<br>Correction of spinal curve in side lying<br>Advise on return to gym<br>Importance of core re prevent recurrence                                                                                                                                                                                                                                                                             |
| Reduced general strengthening | 10 | Lower limb strengthening exercises    | 9 | Resisted plantar flexion with green theraband x 15 reps per day increase / decrease as able. Toe raises second treatment session<br>Calf raise and tibialis anterior strengthening<br>Right gluteal strengthening<br>Sit to stand with left foot forward. Stair climbing. Static bike<br>Squats<br>Ankle dorsi flexion active assisted range of movement and strength<br>Isometric calf holds. Calf raises appointment no 2<br>Gluteal exercises<br>Exercise bike, rower |
|                               |    | Upper limb strengthening exercises    | 1 | Advice re lifting weights in gym                                                                                                                                                                                                                                                                                                                                                                                                                                         |
|                               |    | Others                                | 1 | Treatment 2 - did not commence side plank as patient reported mild right leg symptom post exercise. Encouraged hamstring stretch                                                                                                                                                                                                                                                                                                                                         |
|                               | 10 | Specific cautious movements           |   | SLR exacerbated pain for 4/7 at 1st assessment                                                                                                                                                                                                                                                                                                                                                                                                                           |

|                                |    |                             |   |                                                                                                                                                                                                                                                                                                                                                                                                                      |
|--------------------------------|----|-----------------------------|---|----------------------------------------------------------------------------------------------------------------------------------------------------------------------------------------------------------------------------------------------------------------------------------------------------------------------------------------------------------------------------------------------------------------------|
| Reduced neural mobility        |    | SLR performed actively      | 4 | Using hamstring stretch in supine - progressing popliteal angle<br>SLR stretch with dorsi / plantar flexion x30 sec x 3 per day - not into painful range                                                                                                                                                                                                                                                             |
|                                |    | SLR performed passively     | 3 | SLR mobilisations<br>For assessment mild adverse neural tension right leg<br>Decreased SLR due to neural tension                                                                                                                                                                                                                                                                                                     |
|                                |    | Active slump                | 5 | Sitting, left knee extension and dorsi flexion. Replace leg swing with this<br>For adverse neural tension and hamstring length<br>For mild adverse neural tension<br>Use as a treatment to increase neural mobility<br>Pelvic tilts to exercise lower lumbar spine range of movement                                                                                                                                 |
|                                |    | Passive slump               | 1 | With SLR for adverse neural tension                                                                                                                                                                                                                                                                                                                                                                                  |
|                                |    | Others                      | 3 | Sitting, leg swing, increasing reps and frequency if not exacerbating pain<br>Heel and leg slides for gentle decrease adverse neural tension<br>Piriformis release and stretches. Passive range of movement and SLR                                                                                                                                                                                                  |
| Reduced conditioning / fitness | 14 | Graded functional exercises | 8 | Walking<br>Advice on return to gym and cycling<br>Discussed with patient staged return to sport and golf<br>Bike and cross trainer 10% increase distance per week<br>Advised to decrease activity to pace and manage pain and healing<br>Cycling - start at 3/52                                                                                                                                                     |
|                                |    | Paced increase in activity  | 5 | Walking, housework<br>Increase gym activity gradually<br>Walking 3rd session boom/bust activity<br>Session 2 - to start rowing action, progressing exercises accordingly                                                                                                                                                                                                                                             |
|                                |    | General aerobic exercises   | 8 | Encouraged continue with cross trainer and bike in gym, increase gradually<br>Advised to use cardiovascular exercise in gym - treadmill and static bike<br>At treatment 1 already exercising aerobically 2 hours / day<br>Walking, stairs and static bike<br>Discussed with patient gym work<br>Advice on static bike cycling for cardiovascular and neural mobility<br>Exercise bike and stepper<br>Rowing, cycling |

|                                                  |    |                                                   |   |                                                                                                                                                                                   |
|--------------------------------------------------|----|---------------------------------------------------|---|-----------------------------------------------------------------------------------------------------------------------------------------------------------------------------------|
|                                                  |    | General strength training                         | 2 | Continue with gentle upper limb and lower limb weights in gym<br>Discussed with patient gym work                                                                                  |
|                                                  |    | Low intensity exercises                           | 0 |                                                                                                                                                                                   |
|                                                  |    | High intensity exercises                          | 1 | Treatment 2 Encouraged continue with present programme for further week                                                                                                           |
|                                                  |    | Others                                            | 3 | Weight lifting starting low level<br>Muscle energy technique hamstrings, discussed nature of osteoarthritis<br>Muscle energy technique hamstrings                                 |
| Reduced progress / plateau in improvement        | 4  | Continue with exercises independently at home     | 2 | Home exercise programme from hospital. Was performing bridge incorrectly                                                                                                          |
|                                                  |    | Short and longer term goal setting                | 2 | Improved strength and condition – return to work<br>Increase walking                                                                                                              |
|                                                  |    | Planning for the future                           | 1 | Pilates                                                                                                                                                                           |
|                                                  |    | Others                                            | 0 |                                                                                                                                                                                   |
| Pain                                             | 12 | Explanation of pain physiology                    | 5 | Explanation of referred pain                                                                                                                                                      |
|                                                  |    | Advice on pain relief and who to contact          | 4 | General Practitioner review and neuropathic pain agents discussed with patient<br>Discussed with GP re wean from Gabapentin                                                       |
|                                                  |    | Advice re when to stop taking pain killers        | 3 | On paracetamol only                                                                                                                                                               |
|                                                  |    | Advice re how to manage flare ups                 | 0 |                                                                                                                                                                                   |
|                                                  |    | Pain control interventions e.g. Acupuncture, TENS | 1 | Piriformis release and acupuncture                                                                                                                                                |
|                                                  |    | Others                                            | 3 | Advice that intermittent pain nothing to worry about and pain is soft tissue healing<br>Advice sensory stimulus to decreased ankle area<br>Advice regarding preventing recurrence |
| Impaired recovery owing to psychological factors | 2  | Cognitive behavioural approach                    | 0 |                                                                                                                                                                                   |
|                                                  |    | Pacing                                            | 2 | Advice pacing in gym                                                                                                                                                              |
|                                                  |    | Goal setting                                      | 1 | Little and often rather than boom bust                                                                                                                                            |
|                                                  |    | Others                                            | 0 |                                                                                                                                                                                   |

|                                                                               |   |                                           |   |                                          |
|-------------------------------------------------------------------------------|---|-------------------------------------------|---|------------------------------------------|
| Patient not responding / condition deteriorating / experiencing complications | 1 | Liaise with surgical team to discuss case | 0 |                                          |
|                                                                               |   | Liaison with surgical team / colleagues   | 0 |                                          |
|                                                                               |   | Others                                    | 1 | Liaise with consultant re return to work |
